# Supplementary material for: Effects of Climate Conditions before Harvest Date on Edamame Metabolome
Source: Plants (Basel). 2023 Dec 27;13(1):87. doi: 10.3390/plants13010087 (PMC10780805; doi:10.3390/plants13010087)
Supplement: Supplementary file 1 [file plants-13-00087-s001.zip › supplemental Table S1.xlsx]

## Sheet: Table S1
	2013																							2014
µmol/gFW	2013-08-11	2013-08-12	2013-08-13	2013-08-14	2013-08-15	2013-08-16	2013-08-17	2013-08-18	2013-08-19	2013-08-16	2013-08-17	2013-08-18	2013-08-19	2013-08-24	2013-08-25	2013-08-26	2013-08-27	2013-08-28	2013-08-24	2013-08-25	2013-08-26	2013-08-27	2013-08-28	2014-08-13	2014-08-14	2014-08-15	2014-08-16	2014-08-17	2014-08-16	2014-08-17	2014-08-18	2014-08-19	2014-08-20	2014-08-18	2014-08-19	2014-08-20	2014-08-21	2014-08-22	2014-08-23	2014-08-21	2014-08-22	2014-08-23	2014-08-24	2014-08-25	2014-08-24	2014-08-25	2014-08-26	2014-08-27	2014-08-28
Ala	14.4205	14.9635	19.3355	14.8471	24.0945	26.3497	20.211	22.4122	26.5954	20.5358	20.0435	23.9072	26.8012	23.5956	25.5153	24.6539	24.9703	24.789	22.5443	29.0962	18.7283	21.9562	19.9447	17.9054	16.9903	16.5741	11.7241	20.2328	12.2812	11.6601	9.55793	11.1284	13.405	15.7858	13.2402	16.1699	11.7386	17.4219	15.2319	13.7986	13.9095	14.1618	17.1147	9.96533	14.5757	14.9132	15.8268	8.88786	20.9354
Arg	4.46792	3.3163	4.08552	3.56924	5.50718	5.84832	4.96688	5.35078	5.61177	4.44849	4.6658	4.54061	4.75032	5.33164	5.82038	4.55794	4.9756	4.30081	5.35036	6.25589	5.20277	5.69336	4.05472	3.89382	2.9749	3.464	2.35014	3.18855	2.51792	3.52551	2.86159	3.31212	2.9946	3.27428	3.76065	3.49233	3.07883	3.35354	3.30485	5.16787	5.02098	4.09531	4.1917	3.42688	4.64109	3.85437	4.24054	2.59494	4.01065
Asn	8.56631	7.56138	9.20796	7.59966	10.0959	10.8394	8.4773	9.46386	11.2908	8.96997	10.0749	9.87003	9.63302	13.205	13.7183	11.9465	12.2764	13.2164	12.537	13.5664	11.9007	12.7406	10.3407	12.263	11.0471	9.45345	7.23556	10.4231	7.06902	7.84572	6.15299	8.28865	8.71882	10.3076	9.01934	9.39565	8.08047	9.06653	9.93495	12.1782	12.3853	10.4308	10.3826	7.43666	14.3604	8.65614	9.37165	6.41504	10.2895
Asp	1.24957	1.33968	1.30518	1.20418	1.68464	1.74935	1.4307	1.95161	1.20302	1.51142	1.03615	1.62772	0.785722	0.559465	0.57198	1.21821	1.29693	1.53187	1.38357	0.589432	2.45608	2.99979	1.67134	2.83238	1.61712	3.01304	1.00413	0.936906	1.00406	0.765297	1.30267	3.15338	2.5221	1.39754	2.79433	3.13429	2.46514	2.18594	1.63601	3.23887	3.0022	1.23988	2.59846	1.51885	3.66344	1.10799	2.19876	2.53952	0.842229
Cys	0.00122297	0.00203876	0.00397255	0.00190111	0	0.000443999	0.00103839	0.00136275	0.00258479	0.00135169	0.000222404	0.000445728	0.0032244	0	0.0046798	0.000173913	0.00123639	0.000506095	0.00022418	0.000284387	0	0	0.000613941	0.00976676	0.00435491	0.00249805	0.00735522	0.00723967	0.00547291	0.00298034	0.00379141	0.0151988	0.0114216	0.00618914	0.00338133	0.00822482	0.0154692	0.0229038	0.00976469	0.0109363	0.00477637	0.00884468	0.00405793	0.0128058	0.00317175	0.00792598	0.000989503	0.00719376	0.00987277
Glu	9.17789	9.53923	10.6277	7.76844	10.3177	8.05975	7.38474	11.2951	9.5026	8.35065	6.41635	10.7294	10.0234	7.71635	8.14004	7.89855	7.21114	8.50071	7.14321	9.82243	8.08626	9.02599	8.02905	9.67512	8.96593	7.82887	7.19261	8.6513	6.26832	7.44259	7.38581	10.1914	7.65968	10.1498	8.76867	8.01659	7.67007	8.96246	11.919	11.4953	12.1659	11.1178	11.6503	10.3578	14.2625	9.09931	9.83895	8.69903	11.7518
Gln	0.41815	0.556502	0.714591	0.436061	0.890207	1.07666	0.483848	0.723481	1.14203	0.76803	0.593635	0.51475	0.879653	0.403191	0.399748	0.346759	0.92558	0.601377	0.505252	0.5933	1.19255	0.789044	0.761295	0.713837	0.390218	0.436079	0.316173	0.3448	0.281403	0.305187	0.410239	0.454166	0.285473	0.493687	0.320383	0.352443	0.256139	0.407567	0.480649	0.634083	0.475878	0.541892	0.704053	0.723989	0.79129	0.583211	1.03002	0.899198	0.561796
Gly	2.49587	2.83795	3.45885	2.55176	3.65348	3.18934	2.80137	4.10736	4.09518	3.2579	2.72572	3.2418	4.16778	2.91257	3.26586	3.15571	3.07033	3.15425	2.59343	3.00847	2.03271	2.51882	2.84172	2.4541	2.12549	2.24841	1.87842	3.00267	1.95407	2.16954	1.75622	2.2831	2.24755	2.62527	2.60811	2.32883	2.34132	3.43617	2.68172	2.4514	2.66052	2.6474	2.73202	2.34237	2.47526	2.83531	2.68014	1.96474	3.2755
His	2.19848	1.86469	2.45906	2.0661	2.79998	2.7864	2.15909	2.28754	2.47457	2.15707	2.27977	2.03028	2.6938	3.07879	3.28457	2.47476	3.05061	2.41883	3.77918	4.23782	3.25053	4.17041	2.7202	4.27285	3.65433	3.93698	2.58225	4.1299	2.7671	3.06002	2.49073	2.91546	2.7092	3.45763	2.74884	3.39279	2.69648	3.07453	2.55869	3.75679	3.79866	3.10095	2.65064	2.66705	2.999	2.28929	2.69727	2.28786	2.20322
Ile	0.172104	0.232086	0.29141	0.177988	0.286025	0.228574	0.207013	0.241674	0.366389	0.264827	0.187504	0.180624	0.24672	0.305708	0.315143	0.34132	0.299801	0.27478	0.331952	0.300933	0.200535	0.472328	0.248757	0.209749	0.218779	0.223348	0.175616	0.226522	0.177269	0.204197	0.17531	0.25316	0.174227	0.198377	0.213082	0.222566	0.224645	0.228937	0.168055	0.205901	0.211578	0.221528	0.232862	0.158316	0.20306	0.174604	0.237313	0.190875	0.342206
Leu	0.296146	0.242965	0.30129	0.219579	0.306583	0.273309	0.247179	0.251514	0.356998	0.287972	0.280903	0.230505	0.303444	0.343191	0.376364	0.363083	0.318126	0.317661	0.374744	0.453225	0.328311	0.491486	0.303819	0.264401	0.272211	0.295186	0.23326	0.273172	0.265627	0.283473	0.229813	0.300155	0.225588	0.254417	0.297254	0.285535	0.252916	0.265394	0.221393	0.253717	0.298848	0.25384	0.247655	0.213796	0.224751	0.281625	0.281891	0.232757	0.479614
Lys	0.635203	0.582671	0.77728	0.676938	0.954826	0.902209	0.854585	0.976385	1.05257	0.860928	0.645879	0.90931	1.10721	0.64737	0.756741	0.61129	0.557251	0.478676	0.65678	0.689541	0.459611	0.612768	0.545998	0.583668	0.541163	0.583106	0.430164	0.578346	0.494741	0.483849	0.513453	0.553896	0.64871	0.575284	0.668089	0.832991	0.711753	0.760823	0.617484	0.729202	0.886846	0.730433	0.760591	0.461766	0.485807	0.713925	0.727803	0.4505	0.575996
Met	0.251022	0.273861	0.373315	0.23827	0.296011	0.418697	0.403428	0.498008	0.557598	0.384413	0.310554	0.334953	0.473702	0.498636	0.572295	0.376155	0.63557	0.326091	0.312174	0.288091	0.320381	0.245311	0.324598	0.251022	0.273861	0.373315	0.23827	0.296011	0.418697	0.403428	0.498008	0.557598	0.384413	0.310554	0.334953	0.473702	0.498636	0.572295	0.376155	0.63557	0.326091	0.312174	0.288091	0.320381	0.245311	0.324598	0.251022	0.273861	0.373315
Phe	0.118462	0.122035	0.133245	0.110293	0.139259	0.142377	0.131559	0.128411	0.2997	0.194658	0.110169	0.107799	0.17638	0.175115	0.178281	0.124628	0.155413	0.142106	0.128269	0.171821	0.133033	0.138557	0.114691	0.114988	0.120751	0.127518	0.117386	0.113923	0.128939	0.129773	0.145358	0.164983	0.118628	0.143117	0.146636	0.141433	0.151325	0.135334	0.110496	0.133693	0.165776	0.120743	0.131194	0.109414	0.121122	0.126992	0.119246	0.0995481	0.249346
Pro	0.388225	0.291465	0.573523	0.390697	0.202846	0.392371	0.590857	0.619102	1.21783	0.777662	0.559338	0.308537	0.609313	0.363841	0.551453	0.408357	0.467458	0.24972	0.340417	0.346188	0.176068	0.297405	0.341491	0.386841	0.356198	0.360484	0.277494	0.376515	0.246061	0.249552	0.230973	0.403352	0.356572	0.349391	0.405512	0.406721	0.357057	0.43595	0.378093	0.413266	0.412546	0.527997	0.440269	0.406755	0.506481	0.379342	0.407776	0.263103	0.455136
Ser	1.67599	1.67944	2.26062	1.93005	2.38128	2.30013	2.10923	2.75061	2.30007	2.04376	1.82808	2.25441	2.54905	1.99986	2.15829	2.26947	2.37104	2.24931	2.32535	2.27557	1.98515	2.26671	2.48433	2.46393	2.38054	2.42779	1.6024	2.83327	1.59276	1.88688	1.63554	2.25326	2.29596	2.22461	2.51587	2.37949	2.31352	2.68955	2.40389	2.27833	2.6935	2.11711	2.53568	1.76905	2.26916	2.14001	2.36611	1.84011	2.70852
Thr	0.0575148	0.125115	0.243607	0.367678	0.00344047	0.224125	0.005073	0.00811315	0.319439	0.484851	0.194391	0.220102	0.209116	0.164039	0.361735	0.189619	0.621133	0.206434	0.182356	0.209482	0.183032	0.00367679	0.20029	0.605065	0.581272	0.570177	0.436482	0.6439	0.454513	0.441016	0.419769	0.589181	0.583822	0.615943	0.622598	0.637632	0.626928	0.739092	0.601414	0.554946	0.733975	0.596708	0.661129	0.543161	0.610869	0.598107	0.651631	0.530002	0.901011
Trp	0.0628161	0.0924903	0.150609	0.0723822	0.087905	0.0825776	0.0526004	0.0577054	0.108105	0.0821799	0.0522605	0.0548176	0.109414	0.0544636	0.057101	0.0219619	0.0550925	0.0256633	0.125855	0.0632304	0.0575391	0.104286	0.19247	0.0382107	0.0350278	0.0354603	0.0582744	0.0819586	0.103371	0.0615527	0.0715671	0.220564	0.112304	0.0782131	0.106671	0.10623	0.362388	0.0817702	0.0499652	0.0650148	0.0719126	0.173599	0.0813464	0.118837	0.636933	0.0593439	0.087282	0.321334	0.207073
Tyr	0.141082	0.107973	0.15151	0.169462	0.158977	0.25678	0.131168	0.0883781	0.308713	0.231964	0.136954	0.139179	0.163137	0.412963	0.359317	0.199054	0.332473	0.129086	0.19232	0.314474	0.160713	0.0929634	0.113143	0.094681	0.0813849	0.0738027	0.0953303	0.0702532	0.0758815	0.137988	0.0858641	0.0776854	0.0705521	0.08687	0.0765728	0.094268	0.0671912	0.0895302	0.0659983	0.119479	0.137316	0.107078	0.094472	0.0658326	0.104077	0.119881	0.0817818	0.0523516	0.18976
Val	0.388424	0.40842	0.501691	0.384984	0.515955	0.606604	0.489859	0.537815	0.736655	0.578364	0.518354	0.521024	0.744008	0.761436	0.80547	0.632922	0.854219	0.583496	0.578921	0.634859	0.508472	0.518067	0.484117	0.465001	0.490125	0.531342	0.356285	0.450934	0.411115	0.428367	0.335744	0.484218	0.393124	0.407279	0.494727	0.564277	0.46126	0.502784	0.359697	0.514126	0.536239	0.45685	0.517522	0.332935	0.457306	0.493872	0.504088	0.384756	0.61774
GABA	0.342989	0.35643	1.20098	0.844016	0.799198	1.08349	1.19293	1.17796	2.57741	1.46511	1.57952	0.823997	1.16871	1.36059	2.21563	1.4482	1.59565	1.02144	0.78388	1.33388	0.517589	1.41275	1.54085	1.39729	1.31064	1.52405	1.10922	1.30681	1.14374	1.15413	1.22498	1.57205	1.26218	1.40566	1.51205	1.45765	1.2368	1.55341	1.35377	1.37202	1.66838	1.31347	1.14573	1.86772	1.08208	1.11558	1.28579	0.986809	1.37132
b-Ala_	2.66762	2.63822	2.76226	2.03988	4.19134	3.03758	2.0129	3.13841	3.50888	3.27636	3.69964	3.77353	3.74819	2.50317	2.41829	3.25828	2.95837	3.62502	2.63485	3.24159	3.10104	2.73352	3.38945	3.02581	3.20585	3.12781	2.55514	3.08623	2.59062	3.19045	2.90954	2.99836	3.08747	3.73191	4.0032	2.97135	3.28795	3.05108	3.1079	2.76539	4.04836	2.72632	2.77717	2.50791	3.16247	2.7944	2.97853	2.90077	3.79764
HydroxyPro	0.00594497	0.00561186	0.00555835	0.00475348	0.00583581	0.00597928	0.00533799	0.00604176	0.00627801	0.00533785	0.00661904	0.00551005	0.00588663	0.00494594	0.00490899	0.00531701	0.00541897	0.00487112	0.0043866	0.00398255	0.00471895	0.00453521	0.00430377	0.00472973	0.00547175	0.00550998	0.00505669	0.00502391	0.00419701	0.00539251	0.00462484	0.00457648	0.00439753	0.0055865	0.00601373	0.005241	0.00520863	0.00514495	0.00528695	0.00537824	0.00812255	0.00556863	0.00536558	0.00585882	0.00639465	0.00514083	0.0048973	0.00513377	0.00551945
L-Theanin	0.128521	0.131612	0.168926	0.162813	0.166709	0.128114	0.114981	0.129968	0.13746	0.13037	0.149265	0.155077	0.187482	0.083731	0.0891245	0.106172	0.088963	0.0915824	0.14876	0.130245	0.161921	0.151496	0.168301	0.147208	0.161894	0.148861	0.172598	0.167472	0.145439	0.162049	0.188602	0.198596	0.187161	0.212254	0.224054	0.167841	0.209773	0.178948	0.187693	0.143973	0.239895	0.172181	0.188162	0.191794	0.188677	0.163962	0.187178	0.189204	0.218002
Putrescine	0.0100021	0.00930674	0.0054538	0.00450254	0.0107928	0.0104354	0.0124451	0.0163597	0.011249	0.00656737	0.00845077	0.00961023	0.00559087	0.0150252	0.0151563	0.00785352	0.0068505	0.00823184	0.0115102	0.0130703	0.0153062	0.0188979	0.00757546	0.0156691	0.0140494	0.0126014	0.0108672	0.0119158	0.0106461	0.0131037	0.00776545	0.0100748	0.007924	0.00873885	0.0090073	0.012626	0.00983059	0.00828472	0.00772664	0.0128675	0.0107413	0.00775805	0.00791013	0.0119206	0.00759579	0.0100397	0.00913941	0.00803851	0.00632307
Spermidine	0.0195033	0.0160087	0.0110105	0.0156761	0.0251447	0.012718	0.0169714	0.0275951	0.0152046	0.0078092	0.0164503	0.0160631	0.0166348	0.0163251	0.0192667	0.0128167	0.00689226	0.0198768	0.0100683	0.00949821	0.0185093	0.0182365	0.0128002	0.0243035	0.0197743	0.0249242	0.0207481	0.0232511	0.0202511	0.0277376	0.0212585	0.0192965	0.0188564	0.0137996	0.022708	0.020419	0.0240125	0.0182732	0.0222138	0.032144	0.0421143	0.0219484	0.0255249	0.0366083	0.0129852	0.0210056	0.0203591	0.0241511	0.0200409
Agmatine	0.00476011	0.00438472	0.00292653	0.00331419	0.00489103	0.00268487	0.00203945	0.00385261	0.00249252	0.002246	0.0030458	0.00398008	0.00296086	0.00345738	0.00325959	0.00175553	0.00209234	0.00347087	0.0025919	0.00242594	0.00365652	0.00465236	0.00188662	0.00307596	0.00274389	0.00286179	0.00260245	0.00200298	0.0028683	0.00534995	0.0029183	0.00303431	0.00174942	0.00228108	0.00285512	0.0023694	0.0026559	0.00139345	0.00242535	0.00875925	0.0081854	0.00622998	0.00641951	0.00309062	0.00712993	0.00524393	0.00527398	0.00548296	0.00427325
Spermine	0.0016757	0.000940097	0.00113671	0.00543427	0.0036871	0.000506252	0.000914588	0.00346905	0.00203682	0.000499763	0.0026516	0.000932582	0.0064791	0.00108421	0.00551964	0.00250973	0.000507153	0.00190443	0.00113924	0.00027245	0.00210637	0.00114713	0.00168077	0.0026006	0.00108951	0.00338193	0.00067003	0.00271646	0.00155207	0.00122027	0.00211548	0.00162491	0.00246203	0.000722235	0.00254611	0.00176436	0.00358545	0.00192486	0.004035	0.00312316	0.00337989	0.0027231	0.00474759	0.0063971	0.000742992	0.00142995	0.00264171	0.00296081	0.0042501
Tyramine	0.00021401	0.000305304	0.000390285	0.000376863	0.000459114	0.000538441	0.00040967	0.000120403	0.000579637	0.000511204	0.000315881	0.000263972	0.000451203	0.000415177	0.000392137	0.000404532	0.000579089	0.000239706	0.000424123	0.000411009	0.000472659	0.000360458	0.000403813	0.000315999	0.000330552	0.000332114	0.000268155	0.00039868	0.00023456	0.000269342	0.000334648	0.000237249	0.000328158	0.000466895	0.000312611	0.000365602	0.000337254	0.00041092	0.000291148	0.000312654	0.000422831	0.000322589	0.000334333	0.0003868	0.000435025	0.000356011	0.000298061	0.000186689	0.000315053
Pyridoxamine	0.00118648	0.00124979	0.00173178	0.00127159	0.00217121	0.00219665	0.00157854	0.00188679	0.001698	0.00148466	0.00129782	0.00168181	0.00247615	0.00262615	0.00281273	0.00228705	0.00258158	0.00238096	0.0018648	0.0025795	0.00154731	0.00194959	0.00163469	0.00247261	0.00261921	0.00218468	0.00211636	0.00235263	0.00226116	0.00245742	0.00181665	0.00191453	0.00150079	0.00222508	0.00202335	0.00200635	0.00189684	0.0019068	0.00203138	0.00219197	0.00278296	0.00218205	0.00145118	0.00240859	0.00195015	0.00263199	0.00193154	0.00219784	0.0029607
Thiamine	0.000906845	0.000870253	0.000665895	0.00129237	0.00140778	0.000523491	0.000767087	0.000994615	0.000540621	0.000743252	0.000663859	0.00172034	0.00152253	0.00224252	0.00243871	0.000756481	0.00062727	0.000885166	0.00183285	0.00149753	0.00224281	0.00118739	0.000477958	0.00303511	0.00180133	0.00124216	0.00073754	0.0010044	0.000421927	0.00194128	0.00116707	0.000651411	0.000480527	0.000509528	0.00105363	0.000727772	0.000834817	0.000243334	0.000645468	0.000809025	0.000880642	0.000915907	0.000717594	0.00192418	0.00250667	0.0012751	0.00218935	0.00190246	0.00205204
Diethanolamine	0.00823943	0.00697599	0.00672048	0.00190605	0.0133423	0.00377627	0.0096867	0.0095851	0.00864211	0.00195068	0.00710113	0.0049589	0.00477707	0.00782663	0.00376373	0.00550003	0	0.0054184	0.0058121	0.00643334	0.00274951	0.00700299	0.0061263	0.0802135	0.0826173	0.11415	0.020669	0.0530205	0.0136066	0.0540913	0.0602798	0.0277374	0.0185336	0.103632	0.0823292	0.0559417	0.0588218	0.0578256	0.0672324	0.0255149	0.0722587	0.0729237	0.227619	0.0744871	0.0560234	0.0118152	0.0882891	0.111207	0.0693465
Adenine	0.00239922	0.00232914	0.00243212	0.00236564	0.00251781	0.00238564	0.00232736	0.00202687	0.00230819	0.00207326	0.00322017	0.00170394	0.00294261	0.00258977	0.00316831	0.00242057	0.00260694	0.00370121	0.00199463	0.00334107	0.00257219	0.00187179	0.00256667	0.00197704	0.00184854	0.00187766	0.00193284	0.00188028	0.00182757	0.00227952	0.0120406	0.00168025	0.00124597	0.0044692	0.00169537	0.00127442	0.00168534	0.00152056	0.00158795	0.0021822	0.00242364	0.00224321	0.00194987	0.00184214	0.00268369	0.00240419	0.00434636	0.00211592	0.00368778
Adenosine	0.0122053	0.0128134	0.0136879	0.0130626	0.0140922	0.0195121	0.0250814	0.0127447	0.010062	0.0107207	0.0275338	0.0120164	0.00942138	0.0198922	0.0192342	0.0150181	0.0119115	0.0218794	0.0195117	0.0225503	0.0181183	0.0176004	0.0191448	0.0237306	0.0412724	0.058584	0.0234306	0.025375	0.0218796	0.0243783	0.109943	0.0186796	0.0112843	0.0412834	0.0255586	0.0168589	0.0109106	0.0171719	0.0184996	0.0153381	0.0191939	0.0139678	0.0175173	0.0246783	0.0161519	0.0138615	0.0137607	0.0171226	0.0136435
Cytidine	0.00454299	0.00437936	0.00377073	0.00378504	0.00492133	0.00409222	0.00632256	0.00774916	0.00409205	0.00484764	0.00444632	0.00969747	0.00963813	0.00719221	0.0061218	0.00464857	0.003077	0.00598325	0.0172463	0.00201115	0.00762502	0.00637897	0.0040732	0.00502894	0.00578347	0.0056515	0.00412788	0.00528118	0.00491625	0.0093507	0.00783255	0.0023831	0.00251755	0.00545307	0.00339917	0.00297787	0.00168366	0.00319788	0.00433978	0.00360062	0.00808229	0.00639802	0.0032287	0.00449159	0.00406143	0.00637377	0.00215825	0.00357696	0.00880839
Guanosine	0.00371212	0.00402486	0.00498942	0.00580452	0.00656652	0.00712469	0.0111982	0.00484858	0.00323021	0.00292361	0.0104575	0.00354867	0.00505554	0.00704854	0.0067716	0.00429871	0.00499508	0.00663281	0.0109479	0.0117479	0.00622308	0.00386664	0.00475953	0.00945482	0.0160016	0.0111801	0.00681306	0.00934873	0.00688834	0.0123767	0.0209634	0.00376657	0.00337238	0.00780883	0.00453492	0.00395737	0.00278414	0.00372972	0.0049144	0.0034186	0.00758318	0.00438625	0.00352888	0.00986985	0.00457146	0.00584492	0.00333581	0.00490774	0.00884406
AMP	0.153741	0.13538	0.143399	0.103042	0.120419	0.116856	0.108825	0.134496	0.103591	0.0818297	0.111031	0.118211	0.110278	0.0824875	0.0976644	0.0915306	0.111387	0.127369	0.102856	0.100075	0.111218	0.106812	0.107367	0.117433	0.153235	0.179641	0.122699	0.137149	0.0975207	0.150996	0.110793	0.0791766	0.0707007	0.124415	0.133584	0.106077	0.0696332	0.102142	0.105487	0.0904622	0.130525	0.0822863	0.14363	0.129732	0.0980988	0.0907814	0.153987	0.113244	0.10836
ADP	0.016159	0.0340233	0.0428831	0.00412308	0.027453	0.0150903	0.0227023	0.0305378	0.00284473	0.0306113	0.0212332	0.0305556	0.028304	0.0206859	0.016611	0.00932819	0.00148272	0.0251214	0.0280866	0.045611	0.0327681	0.0509589	0.00320313	0.120209	0.0633533	0.0500355	0.0543661	0.0693111	0.0664807	0.0706308	0.0393869	0.141614	0.0988478	0.0886308	0.083166	0.0987423	0.109393	0.109426	0.128984	0.124601	0.136217	0.0845838	0.151527	0.126492	0.213608	0.101433	0.0964814	0.0900109	0.111835
ATP	0.00473749	0.00652321	0.0155364	0.0128323	0.00926864	0.0103324	0.0115835	0.00766934	0.00404531	0.00683709	0.00935811	0.00468566	0.00924939	0.006713	0.0105546	0.00810851	0.01387	0.00409174	0.00901734	0.00959214	0.0100765	0.0153631	0.00661313	0.0421176	0.0141628	0.00532268	0.0217945	0.0153279	0.0201501	0.0198786	0.0143378	0.0498628	0.0556798	0.0302498	0.0307277	0.0579125	0.0515084	0.0572294	0.0385373	0.048267	0.0661463	0.0416178	0.0253251	0.0283975	0.0363283	0.0487435	0.0361408	0.0304531	0.057111
CMP	0.0118935	0.0151229	0.0140505	0.0170825	0.0203721	0.0164407	0.0131459	0.0165267	0.0138035	0.0101447	0.0187937	0.016576	0.0176501	0.0123993	0.0108327	0.0119119	0.0105683	0.00792641	0.00966471	0.0127947	0.015636	0.0171782	0.0126474	0.0229195	0.0101225	0.0146952	0.0100833	0.00750333	0.0114749	0.0112668	0.0150039	0.0138448	0.0156973	0.0125967	0.0211752	0.0236879	0.0148239	0.0198748	0.0142489	0.0243573	0.0273975	0.0138886	0.0288247	0.0161076	0.0310701	0.0172949	0.0243485	0.0242909	0.0136822
CDP	0.00679998	0.0116558	0.0188735	0.0217843	0.00831489	0.0148024	0.0137366	0.0194145	0.0129737	0.00445415	0.0259396	0.0186247	0.0115438	0.0122718	0.0130751	0.0130603	0.010511	0.00553294	0.0124781	0.0165511	0.0201054	0.0175412	0.0104644	0.0244509	0.00751887	0.00582946	0.0104075	0.00649623	0.00846583	0.00679726	0.012877	0.0324669	0.0333166	0.0202545	0.0233666	0.0400126	0.0344691	0.0327709	0.0213701	0.0352926	0.0495228	0.0192974	0.0368684	0.0166138	0.0525271	0.0232751	0.0410391	0.0217142	0.022598
GMP	0	0.00227131	0.00259105	0.00115499	0.00417526	0.000914834	0.000223013	0.00109579	0.00186669	0.00116367	0.00101169	0.00144686	0.000803798	0.00103437	0.00120384	0.00100452	0.0019931	0.00144834	0.00188369	0.00153412	0.0011149	0.00119505	0.000770823	0.00979932	0.0163989	0.0129627	0.0108949	0.0129539	0.00955781	0.0149806	0.0154951	0.00861759	0.00669261	0.0183592	0.00981758	0.00984154	0.0078717	0.00899745	0.010807	0.0096584	0.0140868	0.00779006	0.0111116	0.0140027	0.0104623	0.00992016	0.00477647	0.00993905	0.00660764
GDP	0.0102483	0.00497043	0.00845206	0.00697145	0.00701505	0.00748282	0.00343479	0.00875691	0.00975088	0.00421742	0.0101304	0.00495915	0.00599306	0.00609637	0.00632778	0.0051147	0.00782443	0.00459023	0.00841977	0.00670419	0.00867906	0.00491146	0.00715707	0.0194009	0.0100999	0.0123417	0.00965329	0.0126507	0.0118566	0.0139791	0.00590926	0.0161523	0.0142047	0.0133239	0.0150653	0.0146501	0.014938	0.0162937	0.016894	0.0170729	0.0217658	0.012918	0.0185967	0.0145639	0.0211511	0.0190283	0.0134766	0.0165092	0.0202599
NAD	0.0105265	0.00840044	0.0134028	0.0160002	0.0181037	0.0114997	0.015298	0.0147846	0.00844323	0.00664552	0.00970146	0.0118673	0.0167864	0.0117901	0.0140153	0.0168527	0.0151137	0.00859436	0.0125957	0.0106799	0.0110961	0.013757	0.0133501	0.0254077	0.0193399	0.0184144	0.0278499	0.0176636	0.0266783	0.0228431	0.00505655	0.0253169	0.0225303	0.0181381	0.0260132	0.0231352	0.0294911	0.0274735	0.0216823	0.0266781	0.0376862	0.0230463	0.0130021	0.0358622	0.0147515	0.0281708	0.0180709	0.0342232	0.0316843
NADH	0.00580298	0.00480072	0.00431305	0.00776472	0.00409377	0.00548056	0.00538529	0.00838223	0.00354855	0.00211372	0.00459157	0.00468185	0.00281006	0.00471972	0.0056221	0.00265749	0.00711756	0.00566758	0.00364101	0.00349114	0.0042183	0.00446641	0.0051569	0.00786055	0.0117879	0.00903273	0.00987935	0.016832	0.00766216	0.0166244	0.00491969	0.00811976	0.0084901	0.00496975	0.0128028	0.00778954	0.00750425	0.00885975	0.0121945	0.00468397	0.0175611	0.00656128	0.00945859	0.0106547	0.00344948	0.00698991	0.00543164	0.00759878	0.00810083
Ornithine	0.0295136	0.0331232	0.0432998	0.0456162	0.081428	0.0408506	0.0401158	0.0589769	0.0490666	0.0348754	0.0353243	0.035577	0.0483153	0.0738177	0.0860019	0.0545673	0.062245	0.0478091	0.0395578	0.0711799	0.0389393	0.046391	0.0480278	0.0419276	0.038422	0.043519	0.0299289	0.0418329	0.0305612	0.0330078	0.0376597	0.0289219	0.0266763	0.0373558	0.0378685	0.0356961	0.0244496	0.0286024	0.0267731	0.0311629	0.0466747	0.0268322	0.0233257	0.0440185	0.0271386	0.0481525	0.0417866	0.028914	0.0585095
Citrulline	0.141657	0.0744144	0.100569	0.101881	0.157274	0.265454	0.184458	0.169485	0.291852	0.218662	0.240472	0.116424	0.134417	0.248335	0.248142	0.242195	0.312631	0.172766	0.288472	0.237122	0.320295	0.238823	0.257993	0.110725	0.0866206	0.141694	0.0785614	0.111698	0.0983481	0.123969	0.128295	0.0895119	0.105698	0.129535	0.16242	0.13237	0.105461	0.109454	0.126337	0.168903	0.191473	0.103233	0.116045	0.0990233	0.169027	0.145254	0.172337	0.118279	0.173473
Arginosuccinate	0.0427924	0.0333587	0.0601475	0.0341951	0.0540879	0.0679132	0.0406972	0.0503022	0.0359465	0.0431543	0.0326005	0.0347945	0.0367307	0.0226166	0.0426972	0.0329283	0.0401124	0.0339606	0.047143	0.0348375	0.0610079	0.0327932	0.0319101	0.0639122	0.0596925	0.066377	0.0429593	0.0725834	0.0609244	0.0613491	0.0607928	0.0530695	0.0641223	0.0688819	0.0673982	0.0743217	0.0508044	0.0814402	0.0678398	0.0865745	0.0805057	0.0540925	0.0573586	0.065756	0.0704027	0.0507535	0.0652177	0.0414094	0.06859
Citrate	8.86514	11.9272	12.1239	14.2731	11.1189	9.4564	9.07735	13.3528	8.43892	11.0479	12.4477	11.104	13.0499	9.00491	9.48515	6.95832	6.09271	9.23905	9.54032	9.12885	10.0135	13.1706	10.7566	17.97	20.1904	18.0104	21.1458	15.6717	19.4096	19.9616	20.2604	22.8822	14.7831	20.1759	22.7942	19.0218	21.5581	18.9085	22.5821	18.0422	34.812	15.8422	18.6026	28.3039	17.9343	14.8238	15.4763	19.3177	23.0634
Isocitrate	0.14042	0.218244	0.272332	0.260908	0.179488	0.188753	0.140911	0.232892	0.195439	0.22874	0.24231	0.188219	0.238472	0.164157	0.176384	0.14793	0.141868	0.173902	0.205306	0.179427	0.174728	0.208859	0.23902	0.299949	0.29495	0.310281	0.258375	0.286061	0.331667	0.308047	0.376173	0.359569	0.260775	0.290234	0.348116	0.339703	0.359403	0.333306	0.396056	0.311794	0.492447	0.300366	0.282814	0.568013	0.301895	0.227496	0.226907	0.275051	0.342376
Fumarate	0.0767636	0.0514577	0.0647794	0.0333749	0.101486	0.0522633	0.0979263	0.0850953	0.0269658	0.0399814	0.0745658	0.0752354	0.0746417	0.0646052	0.0259324	0.0600898	0	0.0739565	0.067723	0.0559522	0.0669813	0.132779	0.0458596	0.156075	0.135402	0.119167	0.0922158	0.0660183	0.0886438	0.132735	0.127514	0.101564	0.0829524	0.0999718	0.109559	0.0983084	0.101356	0.105409	0.0910873	0.160529	0.178248	0.101542	0.137947	0.0952432	0.173284	0.100316	0.172417	0.165674	0.0973194
Gluconate	0.132463	0.0872114	0.206651	0.141577	0.122399	0.0860425	0.0677405	0.0980433	0.175154	0.133441	0.158134	0.184433	0.12476	0.060472	0.154706	0.141278	0.0924015	0.0965271	0.176465	0.133771	0.0645442	0.0938712	0.1468	0.121102	0.129046	0.133213	0.139761	0.131332	0.126722	0.131444	0.134784	0.0901886	0.122438	0.145605	0.122265	0.161824	0.138894	0.159472	0.158131	0.108906	0.177726	0.107809	0.120869	0.17333	0.110688	0.136566	0.144948	0.111871	0.139967
Lactate	0.159661	0.197745	0.210021	0.181594	0.202704	0.152674	0.214206	0.167589	0.118529	0.146058	0.164987	0.17484	0.155257	0.0787393	0.126902	0.105398	0.130261	0.21061	0.105935	0.127205	0.196207	0.1745	0.162144	0.175539	0.328421	0.152669	0.100497	0.206771	0.112359	0.109202	0.132135	0.305646	0.150385	0.280335	0.102715	0.107768	0.0483734	0.196449	0.165557	0.0862652	0.285545	0.13345	0.0615509	0.202672	0.504672	0.0574304	0.0628188	0.0654766	0.434659
Shikimate	0.0599506	0.0552022	0.0840299	0.0476329	0.0446364	0.0697487	0.0434572	0.0520977	0.0492787	0.0462821	0.0661832	0.0404215	0.0410928	0.0301593	0.0397323	0.0309202	0.0482562	0.054774	0.0530412	0.0381562	0.0556	0.041134	0.0506478	0.0745066	0.0848977	0.0687611	0.0487885	0.0651809	0.0537056	0.0603837	0.0491728	0.0546568	0.0439692	0.0632385	0.0552824	0.0576022	0.04764	0.0418989	0.0612422	0.0635169	0.0703384	0.0488873	0.0651046	0.0697659	0.078625	0.05615	0.0565054	0.0503697	0.0649986
Quinate	0.00719632	0.00669516	0.0117263	0.0106019	0.00615467	0.012363	0.0136966	0.00827638	0.00684707	0.0112403	0.0057112	0.00828712	0.0110874	0.0059232	0.00367385	0.00384153	0.00410771	0.00613099	0.00813156	0.00847871	0.00508487	0.0092818	0.00256534	0.00667058	0.00588206	0.00644773	0.00668875	0.00705377	0.00772807	0.00522563	0.00507282	0.0070515	0.00519086	0.00694885	0.0060009	0.00781289	0.0067233	0.00838778	0.00679261	0.00649118	0.00879765	0.00779001	0.00678447	0.00960281	0.00546542	0.00620331	0.0045585	0.00581687	0.00682306
Choline	2.96158	3.27074	4.22924	3.79157	4.29827	3.36395	3.85781	2.84703	2.62477	2.24275	5.11096	3.35425	3.37689	1.77848	1.87436	1.32729	1.0502	1.89584	3.40566	3.59368	3.66447	3.52577	3.50648	2.04785	1.74051	1.79713	1.5878	1.5806	1.40859	1.69853	1.28949	1.76568	1.82375	1.78309	2.09358	1.9866	1.78333	1.82446	1.63807	1.57648	2.43183	1.39936	1.54594	2.23286	1.84755	1.32753	1.63147	1.13913	1.63524
Betaine	210.532	145.412	77.7087	69.8393	79.0032	66.7744	65.784	90.6617	62.8085	63.7343	59.9707	71.741	73.8195	85.9577	96.7415	79.1799	80.8962	66.1666	107.681	83.5967	112.224	131.269	115.47	97.7592	91.1315	88.8145	75.6527	91.2196	74.7671	75.7182	78.4823	90.6109	74.3364	140.668	109.764	79.9285	94.5402	93.0427	103.342	123.43	171.754	108.667	100.6	131.051	344.749	143.237	183.377	151.165	217.641
Pipecolate	38.3646	45.2634	68.8695	54.5877	46.4077	51.1897	28.6592	34.556	23.959	23.7181	34.1865	20.147	30.3323	74.5696	62.7055	57.3167	103.528	44.6872	64.8935	85.2655	48.03	73.153	60.0172	37.6097	30.9174	23.8262	27.7694	34.7517	22.5971	37.8057	23.0018	20.3403	26.5852	34.9415	47.5405	21.6336	22.2049	25.8799	32.1769	31.6518	40.3874	29.9122	21.9962	27.6528	170.687	101.513	98.8292	70.6126	96.2589
[truncated: 135 more columns]
